# Supplementary material
Source: publisher site journal article supplement (http://kjim.org/upload/media/kjim-2020-098-suppl.pdf)
Supplement: Supplementary file 1 [file kjim-2020-098-suppl.pdf]

**Supplementary Table 1. Demographic and clinical characteristics of the patients with autoimmune diseases other than systemic lupus erythematosus**

| Disease                                               | Systemic sclerosis<br>(n = 1,157) | RA<br>(n = 21,895) | DM/PM<br>(n = 1,237) | Pemphigus<br>(n = 856) | Sjogren's syn-<br>drome<br>(n = 14,470) | IBD<br>(n = 1,883) |
|-------------------------------------------------------|-----------------------------------|--------------------|----------------------|------------------------|-----------------------------------------|--------------------|
| Sex, male/female                                      | 317/840                           | 5,260/16,635       | 427/810              | 402/454                | 1,475/12,995                            | 1,177/706          |
| Age at onset of autoimmune disease, yr                | 53.3 ± 14.2                       | 54.2 ± 14.2        | 51.4 ± 14.5          | 53.9 ± 16.3            | 54.9 ± 14.1                             | 44.2 ± 15.0        |
| AVN                                                   | 6 (0.5)                           | 186 (0.8)          | 26 (2.1)             | 20 (2.3)               | 53 (0.4)                                | 11 (0.6)           |
| <b>Comorbidities</b>                                  |                                   |                    |                      |                        |                                         |                    |
| Diabetes mellitus                                     | 112 (9.7)                         | 2,295 (10.5)       | 172 (13.9)           | 121 (14.1)             | 1,022 (7.1)                             | 105 (5.6)          |
| Hypertension                                          | 290 (25.1)                        | 5,200 (23.7)       | 279 (22.6)           | 180 (21.0)             | 2,560 (17.7)                            | 180 (9.6)          |
| Hyperlipidemia                                        | 97 (8.4)                          | 1,860 (8.5)        | 102 (8.2)            | 68 (7.9)               | 1,122 (7.8)                             | 64 (3.4)           |
| Gout                                                  | 34 (2.9)                          | 1,028 (4.7)        | 32 (2.6)             | 10 (1.2)               | 282 (1.9)                               | 31 (1.6)           |
| Asthma                                                | 46 (4.0)                          | 805 (3.7)          | 47 (3.8)             | 18 (2.1)               | 501 (3.5)                               | 17 (0.9)           |
| COPD                                                  | 34 (2.9)                          | 448 (2.0)          | 43 (3.5)             | 17 (2.0)               | 224 (1.5)                               | 10 (0.5)           |
| Proteinuria                                           | 6 (0.5)                           | 80 (0.4)           | 5 (0.4)              | 4 (0.5)                | 84 (0.6)                                | 1 (0.1)            |
| Nephrotic syndrome                                    | 13 (1.1)                          | 58 (0.3)           | 2 (0.2)              | 2 (0.2)                | 44 (0.3)                                | 1 (0.1)            |
| End-stage renal disease                               | 21 (1.8)                          | 73 (0.3)           | 7 (0.6)              | 5 (0.6)                | 45 (0.3)                                | 3 (0.2)            |
| Mean daily dose of prednisone-equivalent dose, mg/day | 3.8 ± 8.4                         | 2.6 ± 3.6          | 11.6 ± 20.8          | 7.7 ± 9.0              | 1.3 ± 3.8                               | 2.1 ± 4.3          |
| Low dose, ≤ 7.5                                       | 1,002 (86.6)                      | 20,411 (93.2)      | 664 (53.7)           | 540 (63.1)             | 13,981 (96.6)                           | 1,742 (92.5)       |
| Medium dose, 7.51–30                                  | 141 (12.2)                        | 1,456 (6.6)        | 488 (39.5)           | 290 (33.9)             | 452 (3.1)                               | 134 (7.1)          |
| High dose, > 30                                       | 14 (1.2)                          | 28 (0.1)           | 85 (6.9)             | 26 (3.0)               | 37 (0.3)                                | 7 (0.4)            |
| Total cumulative dose of corticosteroid, g            | 3.6 ± 5.1                         | 3.6 ± 4.8          | 9.6 ± 11.2           | 9.2 ± 12.0             | 1.4 ± 3.6                               | 2.5 ± 5.3          |

Values are presented as mean ± standard deviation or number (%).

RA, rheumatoid arthritis; DM, dermatomyositis; PM, polymyositis; IBD, inflammatory bowel disease; AVN, avascular necrosis; COPD, chronic obstructive pulmonary disease.
